# Supplementary material for: Emersion and Relative Humidity Modulate Stress Response and Recovery Dynamics in Juvenile Mussels (Perna canaliculus)
Source: MDPI journal article supplement (doi:10.3390/metabo11090580), 2021-08-27

## Supplementary Material

**Figure S1.** Correlations between oxidative damage and mortality observations after 10 h of recovery in seawater. **(A):** Protein carbonyls (PCs); **(B):** Lipid hydroperoxides (LPs); **(C):** 8-hydroxydeoxyguanosine (8-OHdG; DNA damage). Data from different emersion times were combined to plot oxidative damage versus mortality across emersion time for each relative humidity (RH) treatment.

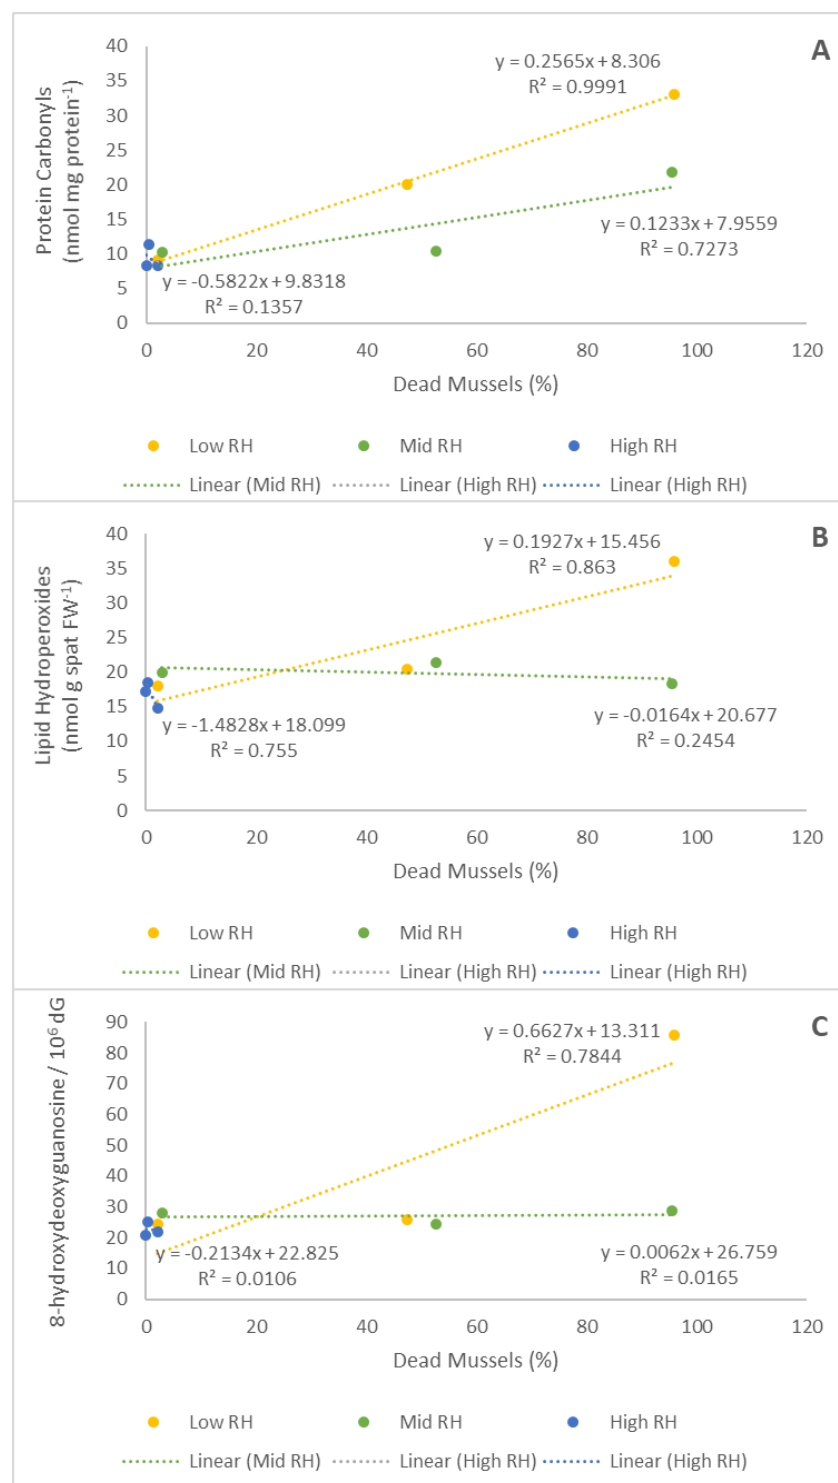

**Figure S2.** Correlations between oxidative damage and mussel staining after 10 h of recovery in seawater. **(A):** Protein carbonyls (PCs); **(B):** Lipid hydroperoxides (LPs); **(C):** 8-hydroxydeoxyguanosine (8-OHdG; DNA damage). Data from different emersion times were combined to plot oxidative damage versus staining across emersion time for each relative humidity (RH) treatment.

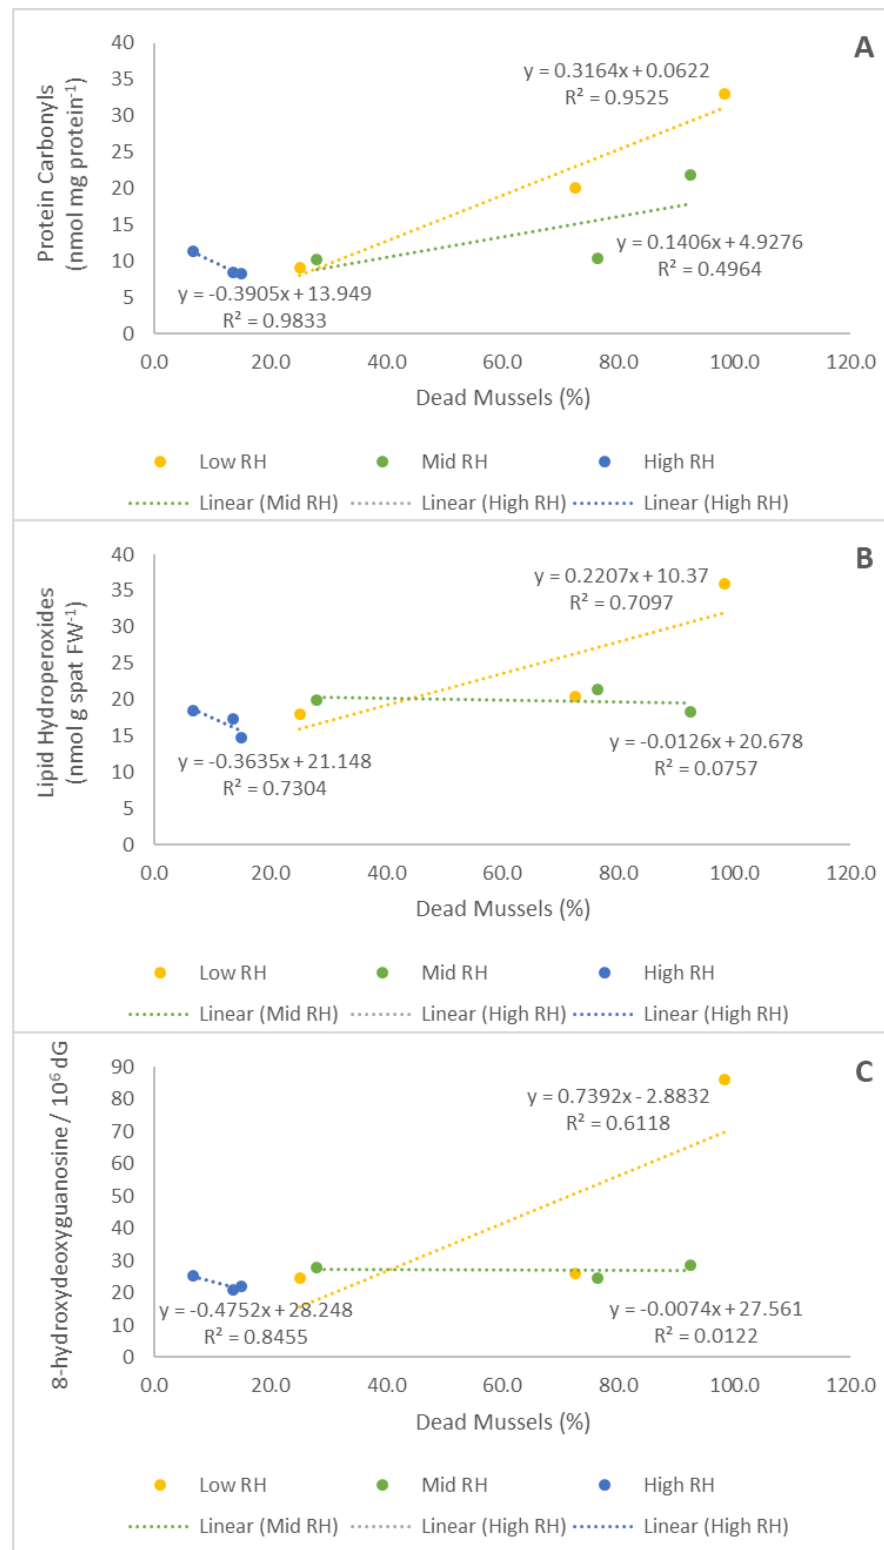

Supplement: s1 [file s1]
